1     **The little caterpillar that could – Tobacco Hornworm (*Manduca sexta*) caterpillars as a**  
2             **novel host model for the study of fungal virulence and drug efficacy**

3

4     Naomi Lyons<sup>1</sup>, Isabel Softley<sup>2</sup>, Andrew Balfour<sup>2</sup>, Carolyn Williamson<sup>2</sup>, Heath O’Brien<sup>3</sup>, and  
5     Stephanie Diezmann<sup>2,4</sup>

6

7

8     <sup>1</sup> School of Molecular Cell Biology and Biotechnology, Tel Aviv University, Tel Aviv, Israel

9     <sup>2</sup> Department of Biology & Biochemistry, University of Bath, Bath, United Kingdom

10    <sup>3</sup> LivingDNA, Frome, United Kingdom

11    <sup>4</sup> School of Cellular and Molecular Medicine, University of Bristol, Bristol, United Kingdom

12

13    Corresponding author:             Stephanie Diezmann

14                                             [s.diezmann@bristol.ac.uk](mailto:s.diezmann@bristol.ac.uk)

15

16    Running title: Caterpillars as fungal virulence host model

17

18    Keywords:     *Manduca sexta*,

19                     caterpillar,

20                     fungal virulence,

21                     *Candida*,

22                     *Cryptococcus*,

23                     *Saccharomyces*,

24                     *Metschnikowia*,

25                     antifungal drug,

26                     host model,

27                     fungal burden

28

## 29 **Abstract**

30 Pathogenic yeast species can cause life-threatening infections in humans. The two leading  
31 yeast pathogens, *Candida albicans* and *Cryptococcus neoformans*, cause systemic infections  
32 in >1.4 million patients world-wide with mortality rates approaching 75%. It is thus  
33 imperative to study fungal virulence mechanisms, stress response pathways, and the efficacy  
34 of antifungal drugs. This is commonly done using mammalian models. To address ethical and  
35 practical concerns, invertebrate models, such as wax moth larvae, nematodes, or flies, have  
36 been introduced over the last two decades. To address short-comings in existing invertebrate  
37 host models, we developed fifth instar caterpillars of the Tobacco Hornworm moth *Manduca*  
38 *sexta* as a novel host model for the study of fungal virulence and drug efficacy. These  
39 caterpillars can be raised at standardised conditions, maintained at 37°C, can be injected with  
40 defined amounts of yeast cells, and are susceptible to the most threatening yeast pathogens,  
41 including *C. albicans*, *C. neoformans*, *C. auris*, and *C. glabrata*. Infected caterpillars can be  
42 rescued by treatment with commonly deployed antifungal drugs and importantly, fungal  
43 burden can be assessed daily throughout the course of infection in a single caterpillar's faeces  
44 and hemolymph. Notably, these animals are large enough so that weight provides a reliable  
45 and reproducible measure of fungal virulence. This model combines a suite of parameters that  
46 recommend it for the study of fungal virulence.

47

## 48 **Introduction**

49 Fungal infections pose a serious threat to human health and well-being world-wide.  
50 Each year, as many, if not more patients, die of fungal infections than of malaria or  
51 tuberculosis<sup>1</sup>. The leading yeast pathogens, *Candida albicans* and *Cryptococcus neoformans*,  
52 together account for >1,400,000 life-threatening infections world-wide with mortality rates  
53 approaching 75%<sup>1</sup>. Candidemia, most commonly caused by *C. albicans*, is the fourth most  
54 common cause of nosocomial blood stream infections, only surpassed by infections with  
55 Staphylococci and *Enterococcus* spp. Disturbingly, candidemia incidence rates are on the  
56 rise. Within less than ten years, incidence rates increased by 36%<sup>2</sup>. Although cryptococcosis  
57 incidence rates are on the decline in North America, this AIDS-defining illness is responsible  
58 for 15% of all AIDS-related deaths world-wide<sup>2,3</sup>. This already dire situation is further  
59 confounded by the emergence of drug resistant yeast species. Patients at risk of developing  
60 invasive candidemia are often prophylactically treated with fluconazole, while the  
61 echinocandins are considered a first line defence strategy<sup>4</sup>. Yet, *C. glabrata*, the most

62 common non- *albicans* *Candida* species associated with nosocomial blood stream infections<sup>5</sup>,  
63 is intrinsically less susceptible to azole drugs and acquires resistance to echinocandins  
64 rapidly<sup>6</sup>. The rapid global spread of multi-drug resistant *C. auris* has further exacerbated the  
65 threat posed by fungi. *C. auris* was first reported in 2009 in Japan<sup>7</sup>. In 2015, *C. auris* arrived  
66 in Europe causing an outbreak involving 72 patients in a cardio-thoracic hospital in London<sup>8</sup>.  
67 *C. auris* outbreaks have been reported from South Korea, India, Spain, Columbia,  
68 Switzerland, Germany, Israel, Kuwait, and Oman<sup>9</sup>. Most concerning, up to 25% of *C. auris*  
69 isolates are multi-drug resistant, with some strains being resistant to three of the four drug  
70 classes available for the treatment of systemic candidemia. In addition to the unacceptably  
71 high burden on human health, fungal infections substantially increase health care costs.  
72 Treatment requires extended hospitalisation, resulting in additional costs of up to \$45,000 in  
73 adult patients or up to \$119,000 in paediatric patients in the case of candidemia<sup>10</sup>.

74         It is thus imperative to investigate fungal virulence and host response mechanisms.  
75 This is traditionally done in mammalian models. The most frequently employed models  
76 include the mouse tail vein infection model for systemic candidemia, the mouse  
77 gastrointestinal infection model of candidemia, the mouse *Candida* vaginitis model<sup>11</sup>, the  
78 mouse inhalation model of cryptococcosis<sup>12</sup>, the rabbit chronic cryptococcal meningitis  
79 model<sup>13</sup>, and the rabbit *Candida* keratitis model<sup>14</sup>. While mammalian models combine a  
80 number of features that make them particularly amenable for the study of fungal diseases,  
81 such as susceptibility, availability of knock-out mutants, and comparable histology to human  
82 disease, using mammals is ethically controversial, economically challenging, and requires  
83 extensive board certifications and documentations. Furthermore, specific applications, such  
84 as the screening of large-scale fungal mutant libraries are not sustainable in mammalian  
85 models.

86         In an effort to reduce the usage of mammals as model hosts, alternative invertebrate  
87 models have been developed and used in fungal virulence research over the past two decades.  
88 The most commonly employed invertebrate species include the nematode *Caenorhabditis*  
89 *elegans*, the fly *Drosophila melanogaster*, and larvae of the Greater Wax moth *Galleria*  
90 *mellonella*. All three species can be easily maintained in the laboratory at a much lower cost  
91 than mice or rabbits and have been successfully used for the study of diverse yeast pathogens,  
92 such as *C. neoformans*<sup>15,16</sup>, *C. albicans*<sup>16-18</sup>, *C. parapsilosis*<sup>18-20</sup>, *C. glabrata*<sup>19,21</sup>. Of note,  
93 invertebrate models differ in their applicability and the best suitable model should be

94 carefully selected<sup>22</sup>. Unlike mammalian host models, these invertebrates do not have adaptive  
95 immunity but all have components of the innate immune system<sup>23,24</sup>, some of which are  
96 conserved with mammals. This includes the Toll-like receptors found in the fly<sup>25</sup> and the  
97 homolog of the MKK3/6 kinase in the nematode<sup>26</sup>. Ironically, it is the Toll-like receptors that  
98 protect flies from infections with *C. neoformans*<sup>27</sup>, *C. albicans*<sup>28</sup>, and *C. glabrata*<sup>29</sup> and the  
99 MKK3/6 homolog SEK-1 protects the nematode from bacterial invaders<sup>26</sup>. Thus, to increase  
100 susceptibility of flies and nematodes to fungal pathogens, Toll and *sek-1*<sup>30</sup> mutants need to be  
101 used. A key limitation for the study of human pathogens, is the inability of the nematode and  
102 the fly to survive human body temperature. Only *Galleria* can withstand 37°C<sup>16</sup>. The *Galleria*  
103 genome has been announced very recently<sup>31</sup>, yet a detailed analysis, including annotations, is  
104 still missing. Due to their long-standing history as eukaryotic models, well-curated genomes  
105 and genome databases exist for the nematode and the fly. Yet, neither organism allows for the  
106 delivery of an exact inoculum of fungal cells, only *Galleria* can be directly injected with a  
107 defined cell number. Until recently, *Galleria* larvae for research had to be purchased from  
108 fishing shops. Now, UK-based TruLarv is selling research grade larvae while extensive stock  
109 collections exist for the fly and nematode.

110 An insect model with a long history in research, the Tobacco Hornworm *Manduca*  
111 *sexta*, has yielded important insights into flight mechanisms, nicotine resistance, hormonal  
112 regulation of development, metamorphosis, antimicrobial defences, and bacterial  
113 pathogenesis. *M. sexta* laboratory stocks have been derived from animals collected in North  
114 Carolina, USA<sup>32</sup> and been maintained in laboratories on both sides of the Atlantic for several  
115 decades. In the wild, *M. sexta* is most commonly encountered in the southern United States,  
116 where it feeds on solanaceous plants and is thus considered a plant pest. *M. sexta*'s research  
117 portfolio includes innate immunity<sup>33</sup>, a genome sequence that has been complemented with  
118 tissue-specific transcriptomic analyses<sup>34</sup>, numerous successful applications of RNAi<sup>35-39</sup>, and  
119 protocols for the efficient extraction of hemocytes for down-stream analyses<sup>40</sup>. But despite its  
120 versatility and prominent role in bacterial pathogenesis research, *M. sexta* has yet to be  
121 explored for its suitability as a host model for fungal infections.

122 Here, we aimed to establish *M. sexta* as a novel model host for the study of fungal  
123 virulence. Inbred animals from the University of Bath's research colony, that has been  
124 established in the 1980s, were tested for their ability to live at 37°C, their susceptibility to  
125 different yeast species, and the reproducibility of *C. albicans* mutant phenotypes obtained in

126 mice virulence studies. Indeed, the caterpillars grow at 37°C while maintaining susceptibility,  
127 specific *C. albicans* mutants are just as attenuated in their virulence in *M. sexta* as they are in  
128 mice, and notably, *M. sexta* are susceptible to the leading yeast pathogens *C. albicans*, *C.*  
129 *neoformans*, as well as the emerging *C. auris*. To expand *M. sexta*'s applicability as a host  
130 model, we developed an infection protocol that permits screening of fungal burden  
131 throughout the course of infection in a single animal and uses weight as a proxy measure for  
132 virulence in addition to survival. *M. sexta* can furthermore be used to test efficacy of common  
133 antifungal drugs. Our results define *M. sexta* characteristics that recommend the caterpillars  
134 as a non-mammalian host model for the study of fungal virulence.

## 135 **Materials and Methods**

### 136 **Origin of the Bath colony of *Manduca sexta***

137 The colony has been in continuous culture since 1978 without the addition of animals  
138 from elsewhere. Bath's genetic stock was derived from animals from the Truman-Riddiford  
139 laboratories at the University of Washington in Seattle, USA. Their animals date back to the  
140 ones originally collected in North Carolina in 1976<sup>32</sup>.

141 .

### 142 **Caterpillar and yeast culture conditions**

143 *M. sexta* caterpillars were reared to fifth instar under standardised conditions. They  
144 were maintained in 125 ml disposable cups (Sarstedt Ltd., Cat. No. 75.1335), on a wheat  
145 germ-based diet (Appendix 1), at a constant temperature of 25°C with 50% humidity, and 12  
146 hours of light and dark cycles. Three days prior to infections with fungi, animals were shifted  
147 to a formaldehyde-free diet as the compound is toxic to non-methylotrophic yeast.

148 For infection assays, yeasts were grown overnight in 50 ml YPD (1% yeast extract,  
149 2% peptone, 2% dextrose) and cells harvested by centrifugation for 3 minutes at 3,000 rpm.  
150 The cell pellet was washed twice with 1x phosphate buffered saline (PBS) and suspended in 5  
151 ml 1x PBS. Cells were counted and numbers adjusted as indicated. *C. albicans* YSD85  
152 (Table 1) cells were heat-inactivated by incubation at 65°C for 20 minutes. For long-term  
153 storage, yeast isolates were maintained at -80°C in 25% glycerol.

### 154 **Yeast infections and measurements of fungal burden and drug efficacy**

155 100  $\mu$ l of washed and number-adjusted yeast suspension were injected into each  
156 caterpillar with a 30G1/2" needle (BD Microlance) and a 1 ml NORM-JECT syringe.  
157 Animals were injected through their distal left proleg. Following injection, each animal's  
158 weight was recorded. Animals were scored for survival and weight once daily for three to  
159 four days post infection. During the course of the experiment, animals were kept on a 12 hour  
160 light and dark cycle at the temperature indicated and on their regular diet.

161 To measure fungal burden in caterpillar faeces and hemolymph, six animals were  
162 injected with either 1x PBS or  $10^6$  cells of the wild type YSD89 or the *hog1* mutant strain  
163 YSD883 and kept at 37°C. On day 1, two animals were selected from each group. These  
164 animals were weighted and their hemolymph and faeces collected daily throughout the course  
165 of infection. To collect hemolymph, animals were first kept on ice for 15 minutes. The 'horn'  
166 was then surface sterilised with 70% ethanol and its top 1-2 mm clipped with a pair of micro  
167 scissors. Hemolymph was collected in a pre-chilled 1.5 ml Eppendorf tube and cooled  
168 immediately to reduce polymerisation and melanisation. One faecal pellet was collected daily  
169 with sterile forceps, weighted and suspended in 500  $\mu$ l 1x PBS. Prior to diluting, the mixture  
170 was thoroughly vortexed for 10 seconds, and centrifuged for 5 seconds using a table top  
171 centrifuge to separate faecal matter. To quantify fungal burden, hemolymph and faecal  
172 samples were plated either directly onto YPD-agar with Kanamycin 50  $\mu$ g/ml or in ten-fold  
173 serial dilutions. Agar plates were incubated at 30°C for 48 hours and colonies counted.

174 To assess the efficacy of commonly used antifungal drugs, animals were infected with  
175  $10^7$  cells of YSD85 or PBS and treated with increasing doses of fluconazole and caspofungin  
176 (Sigma Aldrich, Inc.) as indicated. Drugs were injected with an ethanol-sterilized Hamilton  
177 syringe in a total volume of 10  $\mu$ l per animal, 30 minutes post-infection. Caterpillars were  
178 weighted and scored for survival on the day of injection and the following three days.

## 179 **Statistical analyses**

180 Survival plots were made using the **survminer** R package ([https://CRAN.R-](https://CRAN.R-project.org/package=survminer)  
181 [project.org/package=survminer](https://CRAN.R-project.org/package=survminer)), and differences were evaluated using the Kaplan-Meier  
182 method. Weight and fungal burden were plotted using **ggplot2**<sup>41</sup> and weight differences were  
183 evaluated using linear models with day post-inoculation and the interaction between  
184 treatment and dpi as fixed effects and individual as a random effect using **nlme**

185 (<https://CRAN.R-project.org/package=nlme>). All analyses were done using RStudio version  
186 1.1.442.

## 187 **Results**

188 We first aimed to determine if *M. sexta* fifth instar caterpillars, reared and maintained  
189 at standard conditions (Fig. 1a), are susceptible to *Candida albicans*. To do so, groups of ten  
190 animals were infected with increasing doses of the widely used *C. albicans* laboratory strains  
191 SC5314 and SN95<sup>42</sup>. Animals were scored daily for survival for three consecutive days while  
192 being maintained at 25°C. Dead animals differ from live ones in that their bodies go limp and  
193 turn grey-green in colour, which is in stark contrast to the vivid turquoise of live animals  
194 (Fig. 1b). Indeed, caterpillars that were infected with *C. albicans* succumbed to the yeast in a  
195 dose-dependent manner. Both *C. albicans* strains killed *M. sexta* caterpillars efficiently at  
196 inocula of 10<sup>6</sup> or 10<sup>7</sup> cells per animal (Fig. 1c). To determine if survival measures in  
197 caterpillars are comparable to those obtained in the current gold standard, the murine model  
198 of systemic candidemia, we tested *C. albicans* mutants with published phenotypes of either  
199 attenuated virulence, such as the *hog1Δ/Δ*<sup>43</sup> and *ahr1Δ/Δ*<sup>44</sup> mutants, or wild-type levels of  
200 virulence, such as *cka2Δ/Δ*<sup>45</sup>. Cross-species virulence levels are comparable for Hog1, which  
201 is as essential for virulence in caterpillars as it is in mice. Cka2 is not required to establish  
202 systemic infections in mammals but is in caterpillars. Ahr1, while required for virulence in  
203 mammals, appears to be dispensable for virulence in caterpillars (Fig. 1d).

204 Given the importance of temperature for fungal virulence, we aimed to determine if  
205 *M. sexta* retained their susceptibility to *C. albicans* at human body temperature of 37°C.  
206 Temperature itself does not affect caterpillar survival or development (Fig. S1) but animals  
207 are ten times more susceptible to infections with *C. albicans* at 37°C than they are at 25°C  
208 (Fig. 2a). At 37°C, 10<sup>6</sup> *C. albicans* cells per animal lead to 100% mortality on day 4, while  
209 10<sup>7</sup> cells are required for the same outcome at 25°C (Fig. 1b). To exclude the possibility that  
210 mortality is due to starvation rather than the outcome of a host-pathogen interaction, we  
211 infected caterpillars with live and heat-killed *C. albicans* wild-type cells at 37°. Only live  
212 cells, but not heat-killed *Candida* cells, kill caterpillars suggesting that killing is not due to  
213 nutritional limitations (Fig. S2). Demonstrating susceptibility of *M. sexta* caterpillars to  
214 *Candida albicans* supports their suitability as an alternative host model for the study of  
215 fungal virulence but also highlights the need for additional measures of fungal virulence. To  
216 add granularity to fungal virulence data collected from *M. sexta*, we complemented measures

217 of survival with quantifications of weight and fungal burden throughout the course of  
218 infection. To collect weight data, caterpillars were weighted prior to infection and then daily  
219 throughout the course of infection. Weight gain in animals infected with a low dose of  $10^4$   
220 cells did not significantly differ from those injected with 1x PBS but caterpillars infected  
221 with  $10^5$  cells per animal exhibited significant weight loss. Too few animals survived  
222 infection with  $10^6$  cells to allow for a meaningful comparison (Fig. 2b). After establishing  
223 susceptibility of *M. sexta* to *C. albicans* at 37°C, we aimed to validate the attenuated  
224 virulence phenotype of the *hog1*Δ/Δ mutant strain. To test this, caterpillars were infected with  
225  $10^6$  cells per animal with the wild type strain, the *hog1*Δ/Δ mutant, and the complemented  
226 strain *hog1/hog1::HOG1* and compared to the control group injected with 1x PBS. The  
227 *hog1*Δ/Δ mutant is less virulent than the wild type (Fig. 2c). Animals infected with the  
228 *hog1*Δ/Δ mutant strain JC 50 gained significantly more weight than those infected with the  
229 wild type RM1000, while infection with the complemented strain JC52 leads to a comparable  
230 lack in weight gain (Fig. 2d).

231 To further expand the applicability of *M. sexta* caterpillars as a host model for fungal  
232 infections, fungal burden in the hemolymph and faeces was quantified daily throughout the  
233 course of infection. Since neither the collection of hemolymph nor that of faeces necessitates  
234 killing of the animal, data could be collected daily throughout the infection for the same  
235 caterpillar. Animals infected with the wild type and the *hog1*Δ/Δ mutant strain YSD883 were  
236 compared to control animals injected with 1x PBS only. Analysing fungal burden by counting  
237 colony-forming units in faeces and hemolymph in two animals per group, revealed an  
238 increase in CFU counts in the animals infected with the wild type but not the *hog1*Δ/Δ mutant  
239 or the PBS-control group (Figs. 3a, b). While no yeasts were detected in either group one day  
240 post infection (p.i), CFUs in faeces and hemolymph are detectable two days p.i. in animals  
241 injected with the wild type. Three days p.i., the CFU count in the wild-type group increase  
242 while CFUs are detected for the first time in the *hog1*Δ/Δ group. In keeping with the increase  
243 in fungal burden, weight gain in the wild-type infected group was reduced, while *hog1*Δ/Δ  
244 infected animals gained weight at a similar rate to the control animals (Fig. 3c). Thus,  
245 measurements of fungal burden, that can be obtained from the same animal throughout the  
246 course of infection, provide a valuable parameter for the study of fungal virulence.

247 The currently available armamentarium of antifungal drugs is limited and often  
248 lacking in efficacy. Studying drug efficacy and drug mode of action in the host are thus



249 pertinent to the much needed development of novel antifungal drugs and further  
250 characterisation of existing compounds. To establish suitability of *M. sexta* as a model for  
251 drug efficacy testing, we recorded survival and weight of animals infected with the *C.*  
252 *albicans* wild-type strain SC5314 and treated with increasing doses of two common  
253 antifungals, fluconazole and caspofungin (Fig.4). Treatment with fluconazole or caspofungin  
254 resulted in overall improved survival and weight gain. Pair-wise comparisons between  
255 different drug concentrations with the untreated control animals yielded no statistical  
256 significance for the fluconazole-treated group of caterpillars but those being treated with 2  
257 mg/kg and 4 mg/kg of caspofungin survived significantly better than those without treatment  
258 or those that only received 1 mg/kg of caspofungin (Table 2).

259 While *C. albicans* undoubtedly is a leading fungal pathogen of humans, clinical  
260 manifestations of fungal infections are not limited to *C. albicans*. To broaden *M. sexta*'s  
261 applicability, we sought to determine the caterpillars' susceptibility to other fungal  
262 pathogens. To this end, animals were infected with *C. neoformans*, *C. auris*, and *C. glabrata*  
263 in addition to *C. albicans*. Type strains of *Saccharomyces cerevisiae*, the baker's or brewer's  
264 yeast and *Metschnikowia pulcherrima*, a yeast inhabiting fruits and flowers<sup>46</sup> served as  
265 reference points for attenuated virulence infections. Animals were infected with increasing  
266 doses of yeast cells starting at  $10^5$  cells per animal and up to  $10^9$  cells per animal. Groups of  
267 ten animals per yeast cell dose and species were then screened for survival and weight daily  
268 (Figs. 5 and 6). Notably, only infections with pathogenic yeast species caused reduced  
269 survival of caterpillars (Fig. 5). Infections with *S. cerevisiae* or *M. pulcherrima* did not affect  
270 survival of caterpillars. Comparing survival amongst the pathogenic yeast species revealed *C.*  
271 *albicans* to be the most severe.  $10^7$  *C. albicans* cells per animal result in 100% killing within  
272 in 24 hours.  $10^9$  *C. auris* cells were required to kill all animals within four days and the same  
273 dose of *C. glabrata* resulted in 75% killing.  $10^8$  *C. neoformans* cells were required to achieve  
274 50% killing within four days, comparable to survival of animals infected with *C. glabrata*. It  
275 should be noted that due to high viscosity of the cell suspension, we could not test higher  
276 concentrations than the ones stated. In addition to assessing survival, each surviving  
277 caterpillar's weight was recorded daily. Interestingly, while infections with *S. cerevisiae* or  
278 *M. pulcherrima* did not kill caterpillars, infected animals displayed reduced weight gain (Fig.  
279 6). Infections with *C. albicans* resulted in severely reduced weight gain, even at the lowest  
280 yeast dose tested. Animals infected with *C. auris* and *C. glabrata* responded in a dose-  
281 dependent manner, the higher the yeast dose, the more dramatic the weight loss. Notably,

282 animals infected with the lowest dose of *C. neoformans* grew better than PBS-injected control  
283 animals. Increasing the yeast dosage, however, resulted in significantly reduced weight gain.  
284 This bi-phasic pattern, resembling hormesis<sup>47</sup> in which a low dose of an environmental agent  
285 is beneficial, while a high dose is toxic, could be due to *C. neoformans*' immunogenic  
286 capsule<sup>48</sup>. Caterpillars displaying variable degrees of susceptibility to different yeast species,  
287 with weight providing an additional measure of host damage, suggests that this host model is  
288 broadly applicable for the study of fungal virulence.

## 289 **Discussion**

290 *M. sexta* caterpillars are naturally susceptible to the leading human yeast pathogens.  
291 Unlike other host models, they permit assessment of fungal burden daily throughout the  
292 course of infection in a single animal by either collecting faeces or hemolymph. *M. sexta* can  
293 be maintained at 37°C, is large enough to be injected with a specified yeast inoculum and for  
294 weight to be a reliable measure of virulence. *C. albicans* mutant virulence phenotypes found  
295 in mice can be replicated and yeast inocula required to elicit a response in caterpillars are  
296 comparable to those used in the murine model. Additionally, the caterpillars permit study of  
297 antifungal drug efficacy. These parameters commend this invertebrate as a novel host model  
298 for the study of fungal virulence.

299 This new model system allows for fungal burden to be monitored throughout the  
300 course of infection in a single animal via CFU count. This is unlike any other experimental  
301 system, where fungal burden is either an endpoint measure in the mouse kidney, in  
302 homogenised moth larvae<sup>49</sup>, nematodes<sup>50</sup>, flies<sup>51</sup>, or requires genetically modified  
303 fluorescent yeast strains for microscopic imaging and analyses<sup>52</sup>. While we did detect very  
304 low CFU counts in the PBS control 3 days post infection, we consider this spurious finding  
305 due to cross contamination as preliminary experiments of plating contents of hemolymph and  
306 faeces of naïve animals did not detect any yeast growth (data not shown). As a consequence,  
307 we amended to protocol to include changing gloves when handling animals of different  
308 treatment groups.

309 When reviewing the weight data collected as part of our study, we noticed two  
310 interesting aspects. First, while *S. cerevisiae* and *M. pulcherrima* do not affect caterpillar  
311 survival, infections with either species led to reduced weight gain. The dichotomy between  
312 survival and weight observed here, further emphasizes that fungal virulence comprises more

313 than a measure of survival. It appears that *M. sexta* would allow to discrimination between  
314 disease (weight) and death (survival) quantitatively adding further granularity to measuring  
315 fungal virulence. Secondly, infections with *C. neoformans* resulted in increased caterpillar  
316 weight gain at a low yeast dose but reduced weight gain at higher doses. This pattern  
317 resembles the concept of hormesis often deployed by toxicologists to describe the response to  
318 toxins, where exposure to a low dose is beneficial while a higher dose results toxicity due to  
319 overcompensation in response to disruption of homeostasis<sup>53</sup>. While tissue-specific hormetic  
320 responses have been described in flies, where a virus-acquired cytokine relays ageing<sup>54</sup>, and  
321 examples of abiotic factors or signalling molecules affecting peas and aphid infestation<sup>55</sup>,  
322 immunity in plants<sup>56,57</sup>, life-span in malaria-transmitting *Anopheles*<sup>58</sup>, and larval development  
323 in Black Cutworm<sup>59</sup>, this example here could be the first involving a eukaryotic host-  
324 pathogen relationship. The underlying factor remains to be elucidated but *C. neoformans*'  
325 highly immunogenic capsule seems to be an excellent candidate<sup>48</sup>.

326 Heat-killed *C. albicans* cells appear to be entirely non-pathogenic in *M. sexta*  
327 caterpillars as neither survival nor weight are affected by inoculation with heat-killed yeast  
328 cells. The lack of mortality in response to inoculation with heat-killed yeast cells indicates  
329 that yeast viability and proliferation are required for pathogenesis and excludes the possibility  
330 of death due to an allergic reaction in response to a large number of fungal cells. This appears  
331 to differ from the responses of other host models to fungal pathogens. While susceptibility  
332 was reduced, but still measurable, in *G. mellonella*<sup>60</sup> and the two-spotted cricket<sup>61</sup>, heat-killed  
333 *C. albicans* cells elicited 100% mortality in a sepsis-like murine model<sup>62</sup>. In mice, serum  
334 levels of  $\beta$ -(1,3)-glucan levels were elevated in animals injected with heat-killed yeast cells  
335 when compared to those infected with live cells. Indeed, heat inactivation leads to increased  
336 exposure of  $\beta$ -(1,3)-glucan on the *C. albicans* cell surface<sup>63</sup> and  $\beta$ -(1,3)-glucan activates the  
337 innate immune response in invertebrates and mammals<sup>64</sup>. Given the complexity of receptors  
338 involved in recognition of fungal invaders<sup>65</sup> and the lack of a response in *M. sexta* and other  
339 invertebrates indicates that they may not host all or identical receptors as mammals.

340 We showed that *Manduca sexta* caterpillars expand the repertoire of invertebrate  
341 models for the study of fungal disease. It combines the unique advantage of allowing  
342 measurement of fungal burden with standard quantifications of survival and weight.  
343 Although, *M. sexta* genomic and transcriptomic analyses are currently still in their infancy,  
344 we would expect that the Tobacco Hornworm's long history of being an invaluable model for

345 diverse facets of biology will lead to reliable tools in combination with genetic tractability  
346 and protocols establishing the yeasts' fate inside the caterpillar.

### 347 **Acknowledgements**

348 We would like to thank Ewan Basterfield and Chris Apark for expert advice and  
349 technical assistance in preparing *M. sexta* caterpillars. Thanks to all the laboratories who  
350 kindly shared their strains with us. This work was supported by an ERC Marie Curie Career  
351 Integration Grant to SD and undergraduate and postgraduate research funding from the  
352 University of Bath.

### 353 **Disclosure of interest**

354 The authors report no interest of conflict.

355

## 356 References

- 357 1. Brown GD, Denning DW, Gow NAR, Levitz SM, Netea MG, White TC. Hidden  
358 killers: Human fungal infections. *Sci Transl Med* 2012; 4:165rv13.
- 359 2. Pfaller MA, Diekema DJ. Epidemiology of invasive mycoses in North America.  
360 *Crit Rev Microbiol* 2010; 36:1–53.
- 361 3. Nyazika TK, Tatuene JK, Kenfak-Foguena A, Verweij PE, Meis JF, Robertson  
362 VJ, Hagen F. Epidemiology and aetiologies of cryptococcal meningitis in Africa,  
363 1950–2017: Protocol for a systematic review. *BMJ Open* 2018; 8:e020654–4.
- 364 4. Pappas PG, Kauffman CA, Andes D, Benjamin DK Jr, Calandra TF, Edwards JE  
365 Jr, Filler SG, Fisher JF, Kullberg B-J, Ostrosky Zeichner L, et al. Clinical  
366 practice guidelines for the management of candidiasis: 2009 update by the  
367 Infectious Diseases Society of America. *Clin Inf Dis* 2009; 48:503–35.
- 368 5. Pfaller MA, Diekema DJ. Epidemiology of invasive candidiasis: A persistent  
369 public health problem. *Clin Microbiol Rev* 2007; 20:133–63.
- 370 6. Jensen RH, Johansen HK, Søes LM, Lemming LE, Rosenvinge FS, Nielsen L,  
371 Olesen B, Kristensen L, Dzajic E, Astvad KMT, et al. Posttreatment antifungal  
372 resistance among colonizing *Candida* isolates in candidemia patients: Results  
373 from a systematic multicenter study. *Antimicrob Agents Chemother* 2016;  
374 60:1500–8.
- 375 7. Satoh K, Makimura K, Hasumi Y, Nishiyama Y, Uchida K, Yamaguchi H.  
376 *Candida auris* sp. nov., a novel ascomycetous yeast isolated from the external  
377 ear canal of an inpatient in a Japanese hospital. *Microbiol Immunol* 2009; 53:41–  
378 4.
- 379 8. Schelenz S, Hagen F, Rhodes JL, Abdolrasouli A, Chowdhary A, Hall A, Ryan  
380 L, Shackleton J, Trimlett R, Meis JF, et al. First hospital outbreak of the globally  
381 emerging *Candida auris* in a European hospital. *Antimicrob Resist Infect*  
382 *Control* 2016; 5:1–7.
- 383 9. Bidaud AL, Chowdhary A, Dannaoui E. *Candida auris*: An emerging drug  
384 resistant yeast – A mini-review. *J Mycol Med* 2018; 28:568–73.
- 385 10. Zaoutis TE, Argon J, Chu J, Berlin JA, Walsh TJ, Feudtner C. The epidemiology  
386 and attributable outcomes of candidemia in adults and children hospitalized in  
387 the United States: A propensity analysis. *Clin Infect Dis* 2005; 41:1232–9.
- 388 11. Segal E, Frenkel M. Experimental *in vivo* models of candidiasis. *JoF* 2018; 4:21–  
389 10.
- 390 12. Zaragoza O, Alvarez M, Telzak A, Rivera J, Casadevall A. The relative  
391 susceptibility of mouse strains to pulmonary *Cryptococcus neoformans* infection  
392 is associated with pleiotropic differences in the immune response. *Infect Immun*  
393 2007; 75:2729–39.
- 394 13. Perfect JR, Lang SD, Durack DT. Chronic cryptococcal meningitis: A new

- 395 experimental model in rabbits. *Am J Pathol* 1980; 101:177–94.
- 396 14. Ray WA, O'Day DM, Head WS, Robinson RD. Variability in isolate recovery  
397 rates from multiple and single breeds of outbred pigmented rabbits in an  
398 experimental model of *Candida* keratitis. *Curr Eye Res* 2009; 3:949–53.
- 399 15. Mylonakis E, Ausubel FM, Perfect JR, Heitman J, Calderwood SB. Killing of  
400 *Caenorhabditis elegans* by *Cryptococcus neoformans* as a model of yeast  
401 pathogenesis. *PNAS* 2002; 99:15675–80.
- 402 16. Fuchs BB, O'Brien E, Khoury El JB, Mylonakis E. Methods for using *Galleria*  
403 *mellonella* as a model host to study fungal pathogenesis. *Virulence* 2014; 1:475–  
404 82.
- 405 17. Pukkila-Worley R, Ausubel FM, Mylonakis E. *Candida albicans* infection of  
406 *Caenorhabditis elegans* induces antifungal immune defenses. *PLoS Pathog*  
407 2011; 7:e1002074.
- 408 18. Chamilos G, Lionakis MS, Lewis RE, Lopez-Ribot JL, Saville SP, Albert ND,  
409 Halder G, Kontoyiannis DP. *Drosophila melanogaster* as a facile model for  
410 large-scale studies of virulence mechanisms and antifungal drug efficacy in  
411 *Candida* species. *J Infect Dis* 2006; 193:1014–22.
- 412 19. Ortega-Riveros M, De-la-Pinta I, Marcos-Arias C, Ezpeleta G, Quindós G, Eraso  
413 E. Usefulness of the non-conventional *Caenorhabditis elegans* model to assess  
414 *Candida* virulence. *Mycopathologia* 2017; 182:785–95.
- 415 20. Gago S, García-Rodas R, Cuesta I, Mellado E, Alastruey-Izquierdo A. *Candida*  
416 *parapsilosis*, *Candida orthopsilosis*, and *Candida metapsilosis* virulence in the  
417 non-conventional host *Galleria mellonella*. *Virulence* 2014; 5:278–85.
- 418 21. Ames L, Duxbury S, Pawlowska B, Ho H-L, Haynes K, Bates S. *Galleria*  
419 *mellonella* as a host model to study *Candida glabrata* virulence and antifungal  
420 efficacy. *Virulence* 2017; 8:1–9.
- 421 22. Desalermos A, Fuchs BB, Mylonakis E. Selecting an invertebrate model host for  
422 the study of fungal pathogenesis. *PLoS Pathog* 2012; 8:e1002451.
- 423 23. Mylonakis E, Aballay A. Worms and flies as genetically tractable animal models  
424 to study host-pathogen interactions. *Infect Immun* 2005; 73:3833–41.
- 425 24. Vogel H, Altincicek B, Glöckner G, Vilcinskis A. A comprehensive  
426 transcriptome and immune- gene repertoire of the lepidopteran model host  
427 *Galleria mellonella*. *BMC Genomics* 2011; 12:308.
- 428 25. Lemaitre B, Nicolas E, Michaut L, Reichhart JM, Hoffmann JA. The  
429 dorsoventral regulatory gene cassette *spätzle/Toll/cactus* controls the potent  
430 antifungal response in *Drosophila* adults. *Cell* 1996; 86:973–83.
- 431 26. Kim DH, Feinbaum R, Alloing G, Emerson FE, Garsin DA, Inoue H, Tanaka-  
432 Hino M, Hisamoto N, Matsumoto K, Tan M-W, et al. A conserved p38 MAP  
433 kinase pathway in *Caenorhabditis elegans* innate immunity. *Science* 2002;

- 434 297:623–6.
- 435 27. Apidianakis Y, Rahme LG, Heitman J, Ausubel FM, Calderwood SB, Mylonakis  
436 E. Challenge of *Drosophila melanogaster* with *Cryptococcus neoformans* and  
437 role of the innate immune response. *Eukaryot Cell* 2004; 3:413–9.
- 438 28. Alarco A-M, Marcil A, Chen J, Suter B, Thomas D, Whiteway M. Immune-  
439 deficient *Drosophila melanogaster*: A model for the innate immune response to  
440 human fungal pathogens. *J Immunol* 2004; 172:5622–8.
- 441 29. Quintin J, Asmar J, Matskevich AA, Lafarge MC, Ferrandon D. The *Drosophila*  
442 Toll pathway controls but does not clear *Candida glabrata* infections. *J Immunol*  
443 2013; 190:2818–27.
- 444 30. Breger J, Fuchs BB, Aperis G, Moy TI, Ausubel FM, Mylonakis E. Antifungal  
445 chemical compounds identified using a *C. elegans* pathogenicity assay. *PLoS*  
446 *Pathog* 2007; 3:e18.
- 447 31. Lange A, Beier S, Huson DH, Parusel R, Iglauer F, Frick J-S. Genome sequence  
448 of *Galleria mellonella* (Greater Wax Moth). *Genome Announc* 2018; 6:61–2.
- 449 32. Flowers RW, Entomologist RYF, 1982. Feeding on non-host plants by the  
450 Tobacco Hornworm (*Manduca sexta* (Lepidoptera: Sphingidae). *JSTOR* 65:523–  
451 30.
- 452 33. Kanost MR, Jiang H, Yu X-Q. Innate immune responses of a lepidopteran insect,  
453 *Manduca sexta*. *Immunol Rev* 2004; 198:97–105.
- 454 34. Kanost MR, Arrese EL, Cao X, Chen Y-R, Chellapilla S, Goldsmith MR,  
455 Grosse-Wilde E, Heckel DG, Herndon N, Jiang H, et al. Multifaceted biological  
456 insights from a draft genome sequence of the Tobacco Hornworm moth,  
457 *Manduca sexta*. *Insect Biochem Mol Biol* 2016; 76:118–47.
- 458 35. Flores-Escobar B, Rodríguez-Magadan H, Bravo A, Soberón M, Gómez I.  
459 Differential role of *Manduca sexta* aminopeptidase-N and alkaline phosphatase  
460 in the mode of action of Cry1Aa, Cry1Ab, and Cry1Ac toxins from *Bacillus*  
461 *thuringiensis*. *Appl Environ Microbiol* 2013; 79:4543–50.
- 462 36. Burke WG, Kaplanoglu E, Kolotilin I, Menassa R, Donly C. RNA interference in  
463 the Tobacco Hornworm, *Manduca sexta*, using plastid-encoded long double-  
464 stranded RNA. *Front Plant Sci* 2019; 10:313.
- 465 37. Eleftherianos I, Millichap PJ, ffrench-Constant RH, Reynolds SE. RNAi  
466 suppression of recognition protein mediated immune responses in the tobacco  
467 hornworm *Manduca sexta* causes increased susceptibility to the insect pathogen  
468 *Photorhabdus*. *Dev Comp Immunol* 2006; 30:1099–107.
- 469 38. Eleftherianos I, Gökçen F, Felföldi G, Millichap PJ, Trenczek TE, ffrench-  
470 Constant RH, Reynolds SE. The immunoglobulin family protein Hemolin  
471 mediates cellular immune responses to bacteria in the insect *Manduca sexta*. *Cell*  
472 *Microbiol* 2007; 9:1137–47.

- 473 39. Kumar P, Pandit SS, Baldwin IT. Tobacco Rattle Virus vector: A rapid and  
474 transient means of silencing *Manduca sexta* genes by plant mediated RNA  
475 interference. PLoS ONE 2012; 7:e31347–10.
- 476 40. Stoepler TM, Castillo JC, Lill JT, Eleftherianos I. A simple protocol for  
477 extracting hemocytes from wild caterpillars. JoVE 2012; :1–6.
- 478 41. Wickham H. ggplot2. New York, NY: Springer-Verlag New York; 2009.
- 479 42. Noble SM, Johnson AD. Strains and strategies for large-scale gene deletion  
480 studies of the diploid human fungal pathogen *Candida albicans*. Eukaryot Cell  
481 2005; 4:298–309.
- 482 43. Alonso-Monge R, Navarro-García F, Molero G, Diez-Orejas R, Gustin M, Pla J,  
483 Sánchez M, Nombela C. Role of the mitogen-activated protein kinase Hog1p in  
484 morphogenesis and virulence of *Candida albicans*. J Bacteriol 1999; 181:3058–  
485 68.
- 486 44. Askew C, Sellam A, Epp E, Mallick J, Hogues H, Mullick A, Nantel A,  
487 Whiteway M. The zinc cluster transcription factor Ahr1p directs Mcm1p  
488 regulation of *Candida albicans* adhesion. Mol Microbiol 2010; 79:940–53.
- 489 45. Chiang LY, Sheppard DC, Bruno VM, Edwards JE, Filler SG. *Candida albicans*  
490 protein kinase CK2 governs virulence during oropharyngeal candidiasis. Cell  
491 Microbiol 2007; 9:233–45.
- 492 46. Vadkertiová R, Molnárová J, Vránová D, Sláviková E. Yeasts and yeast-like  
493 organisms associated with fruits and blossoms of different fruit trees. Can J  
494 Microbiol 2012; 58:1344–52.
- 495 47. Mattson MP. Hormesis defined. Ageing Res Rev 2008; 7:1–7.
- 496 48. Casadevall A, Coelho C, Cordero RJB, Dragotakes Q, Jung E, Vij R, P W. The  
497 capsule of *Cryptococcus neoformans*. Virulence 2018; 0:1–10.
- 498 49. Lu M, Yu C, Cui X, Shi J, Yuan L, Sun S. Gentamicin synergises with azoles  
499 against drug-resistant *Candida albicans*. Int J Antimicrob Ag 2018; 51:107–14.
- 500 50. Sun L, Liao K, Wang D. Effects of magnolol and honokiol on adhesion, yeast-  
501 hyphal transition, and formation of biofilm by *Candida albicans*. PLoS ONE  
502 2015; 10:e0117695–20.
- 503 51. Wurster S, Bandi A, Beyda ND, Albert ND, Raman NM, Raad II, Kontoyiannis  
504 DP. *Drosophila melanogaster* as a model to study virulence and azole treatment  
505 of the emerging pathogen *Candida auris*. J Antimicrob Chemother 2019;  
506 74:1904–10.
- 507 52. Sun L, Zhi L, Shakoor S, Liao K, Wang D. microRNAs involved in the control  
508 of innate immunity in *Candida* infected *Caenorhabditis elegans*. Nature 2016;  
509 :1–13.
- 510 53. Calabrese EJ, Baldwin LA. Hormesis: A generalizable and unifying hypothesis.



- 511 Cr Rev Toxicol 2008; 31:353–424.
- 512 54. Mlih M, Khericha M, Birdwell C, West AP, Karpac J. A virus-acquired host  
513 cytokine controls systemic aging by antagonizing apoptosis. PLoS Biol 2018;  
514 16:e2005796–30.
- 515 55. Woźniak A, Drzewiecka K, Kęsy J, Marczak Ł, Narożna D, Grobela M, Motała  
516 R, Bocianowski J, Morkunas I. The influence of lead on generation of signalling  
517 molecules and accumulation of flavonoids in pea seedlings in response to pea  
518 aphid infestation. Molecules 2017; 22:1404–30.
- 519 56. Bektas Y, Rodriguez-Salus M, Schroeder M, Gomez A, Kaloshian I, Eulgem T.  
520 The synthetic elicitor DPMP (2,4-dichloro-6- $\{(E)\}$ -(3-  
521 methoxyphenyl)imino)methyl}phenol) triggers strong immunity in *Arabidopsis*  
522 *thaliana* and tomato. Nature 2016; :1–16.
- 523 57. Rodriguez-Salus M, Bektas Y, Schroeder M, Knoth C, Vu T, Roberts P,  
524 Kaloshian I, Eulgem T. The synthetic elicitor 2-(5-bromo-2-hydroxy-phenyl)-  
525 thiazolidine-4-carboxylic acid links plant immunity to hormesis. Plant Physiol  
526 2015; 170:444–58.
- 527 58. Drexler AL, Pietri JE, Pakpour N, Hauck E, Wang B, Glennon EKK, Georgis M,  
528 Riehle MA, Luckhart S. Human IGF1 regulates midgut oxidative stress and  
529 epithelial homeostasis to balance lifespan and *Plasmodium falciparum* resistance  
530 in *Anopheles stephensi*. PLoS Pathog 2014; 10:e1004231–14.
- 531 59. Kullik SA, Sears MK, Schaafsma AW. Sublethal effects of Cry 1F Bt corn and  
532 clothianidin on Black Cutworm (Lepidoptera: Noctuidae) larval development.  
533 Jnl Econ Entom 2011; 104:484–93.
- 534 60. Cotter G, Doyle S, Kavanagh K. Development of an insect model for the *in vivo*  
535 pathogenicity testing of yeasts. FEMS Immunol Med Microbiol 2000; 27:163–9.
- 536 61. Kochi Y, Matsumoto Y, Sekimizu K, Kaito C. Two-spotted cricket as an animal  
537 infection model of human pathogenic fungi. DD&T 2017; 11:259–66.
- 538 62. Panpetch W, Somboonna N, Bulan DE, Issara-Amphorn J, Finkelman M,  
539 Worasilchai N, Chindamporn A, Palaga T, Tumwasorn S, Leelahavanichkul A.  
540 Oral administration of live- or heat-killed *Candida albicans* worsened cecal  
541 ligation and puncture sepsis in a murine model possibly due to an increased  
542 serum (1→3)- $\beta$ -D-glucan. PLoS ONE 2017; 12:e0181439–15.
- 543 63. Wellington M, Dolan K, Krysan DJ. Live *Candida albicans* suppresses  
544 production of reactive oxygen species in phagocytes. Infect Immun 2008;  
545 77:405–13.
- 546 64. Means TK, Mylonakis E, Tampakakis E, Colvin RA, Seung E, Puckett L, Tai  
547 MF, Stewart CR, Pukkila-Worley R, Hickman SE, et al. Evolutionarily  
548 conserved recognition and innate immunity to fungal pathogens by the scavenger  
549 receptors SCARF1 and CD36. J Exp Med 2009; 206:637–53.
- 550 65. Netea MG, Brown GD, Kullberg B-J, Gow NAR. An integrated model of the

- 551 recognition of *Candida albicans* by the innate immune system. Nat Rev Micro  
552 2008; 6:67–78.
- 553 66. Blankenship JR, Heitman J. Calcineurin is required for *Candida albicans* to  
554 survive calcium stress in serum. Infect Immun 2005; 73:5767–74.
- 555 67. Bruno VM. Regulation of azole drug susceptibility by *Candida albicans* protein  
556 kinase CK2. Mol Microbiol 2005; 56:559–73.
- 557 68. Smith DA, Nicholls S, Morgan BA, Brown AJP, Quinn J. A conserved stress-  
558 activated protein kinase regulates a core stress response in the human pathogen  
559 *Candida albicans*. Mol Biol Cell 2004; 15:4179–90.
- 560 69. Sniegowski P, Dombrowski P. *Saccharomyces cerevisiae* and *Saccharomyces*  
561 *paradoxus* coexist in a natural woodland site in North America and display  
562 different levels of reproductive isolation. FEMS Yeast Res 2002; 1:299–306.
- 563 70. Pitt JI, Mycologia MM, 1968. Sporulation in *Candida pulcherrima*, *Candida*  
564 *reukaufii* and *Chlamydozoma* species: Their relationships with *Metschnikowia*.  
565 Mycologia 1968; 60:663–685.
- 566 71. Dujon B, Sherman D, Fischer G, Durrens P, Casaregola S, Lafontaine I, De  
567 Montigny J, Marck C, Neuvéglise C, Talla E, et al. Genome evolution in yeasts.  
568 Nature 2004; 430:35–44.
- 569 72. Ben-Ami R, Berman J, Novikov A, Bash E, Shachor-Meyouhas Y, Zakin S,  
570 Maor Y, Tarabia J, Schechner V, Adler A, et al. Multidrug-Resistant *Candida*  
571 *haemulonii* and *C. auris*, Tel Aviv, Israel. Emerg Infect Dis 2017; 23:1–9.
- 572 73. Wong B, Perfect JR, Beggs S, Wright KA. Production of the hexitol D-mannitol  
573 by *Cryptococcus neoformans* *in vitro* and in rabbits with experimental  
574 meningitis. Infect Immun 1990; 58:1664–70.
- 575  
576

577 **Appendices**

578 **Appendix 1 – Food preparation**

579

| <b>Premix</b> |                    | <b>Diet cake</b> |                      |
|---------------|--------------------|------------------|----------------------|
| Amount        | Ingredient         | Amount           | Ingredient           |
| 2,700 g       | Wheatgerm          | 336 g            | Premix               |
| 1,260 g       | Casein             | 1,770 ml         | Distilled water      |
| 1,080 g       | Sucrose            | 22.5 g           | Agar                 |
| 540 g         | Dried active yeast | 4 ml             | Corn oil             |
| 360 g         | Wesson's Salt      | 4 ml             | Linseed oil          |
| 36 g          | Choline chloride   | 8 ml             | 4% Formaldehyde      |
| 72 g          | Cholesterol        | 0.2 g            | Chlorotetracycline   |
| 36 g          | Methyl paraben     | 0.2 g            | Vanderssant vitamins |
| 54 g          | Sorbic acid        | 8 g              | Ascorbic acid        |

580 For the premix, deactivate the yeast by microwaving for 5 minutes on low power  
 581 before mixing all components thoroughly. Store in a cool, dry place.

582 For the diet cake, heat up 650 ml of water on a hot plate while melting the agar in 1 l  
 583 of water by microwaving. Combine the agar with the pre-warmed water, 336 g of premix,  
 584 formaldehyde and oils and mix thoroughly using a stand mixer. Dissolve vitamins, antibiotic,  
 585 and ascorbic acid in the remaining 30 ml of water and add to mixing bowl once the content  
 586 has cooled below 50°C to prevent inactivation of vitamins and antibiotic. Line a large ice  
 587 cube tray with sterile aluminium foil (sterilise by spraying with 70% ethanol) and pour  
 588 mixture into tray. Let the diet mix set for about 1.5 hours, wrap tightly in aluminium foil and  
 589 store at 4°C. Keeps for 3 weeks.

590

591 **Tables**

592 **Table 1:** Yeast strains used in this study.

| Strain ID | Strain Name                   | Species               | Source     |
|-----------|-------------------------------|-----------------------|------------|
| YSD89     | SN95                          | <i>C. albicans</i>    |            |
| YSD85     | SC5314                        | <i>C. albicans</i>    |            |
| YSD883    | hog1 $\Delta/\Delta$          | <i>C. albicans</i>    | This study |
| YSD87     | BWP17                         | <i>C. albicans</i>    | 66         |
| YSD190    | VIC84 (cka2 $\Delta/\Delta$ ) | <i>C. albicans</i>    | 67         |
| YSD192    | VIC93 (cka2/cka2::CKA2)       | <i>C. albicans</i>    | 67         |
| YSD302    | CAS12 (ahr1 $\Delta/\Delta$ ) | <i>C. albicans</i>    | 44         |
| YSD303    | CAS13 (ahr1/ahr1::AHR1)       | <i>C. albicans</i>    | 44         |
| YSD304    | RM1000                        | <i>C. albicans</i>    | 68         |
| YSD305    | JC52 (hog1/hog1::HOG1)        | <i>C. albicans</i>    | 68         |
| YSD306    | JC50 (hog1 $\Delta/\Delta$ )  | <i>C. albicans</i>    | 68         |
| YSD790    | YPS143                        | <i>S. cerevisiae</i>  | 69         |
| YSD1448   | NCYC2580                      | <i>M. pulcherrima</i> | 70         |
| YSD465    | 2001                          | <i>C. glabrata</i>    | 71         |
| YSD1454   | TA004-14                      | <i>C. auris</i>       | 72         |
| YSD1028   | H99                           | <i>C. neoformans</i>  | 73         |

593

594

595 **Table 2:** Statistical significance values of survival of animals treated with antifungal drugs  
596 compared to those not receiving treatment.  
597

| <b>Fluconazole</b> |         | <b>Caspofungin</b> |         |
|--------------------|---------|--------------------|---------|
| Concentration      | p-value | Concentration      | p-value |
| 1 mg/kg            | 0.54    | 1 mg/kg            | 0.8     |
| 4 mg/kg            | 0.63    | 2 mg/kg            | 0.015   |
| 16 mg/kg           | 0.68    | 4 mg/kg            | 0.0022  |
| 32 mg/kg           | 0.27    |                    |         |
| 64 mg/kg           | 0.13    |                    |         |

598

599

600 **Figure Captions**

601 **Figure 1: *M. sexta* caterpillars are susceptible to infections with *C. albicans*.** **a)** *M. sexta*  
602 fifth instar caterpillar prior to injection weighing ~2 g. **b)** 24 hours post injection, the dead  
603 animal on the left has lost colour and rigor compared to the live animal on the right. **c)**  
604 Survival curves of animals infected with *C. albicans* SN95 or SC5314. Killing occurs in a  
605 dose-dependent manner at  $10^6$  and  $10^7$  yeast cells per animal. **d)** Survival curves of animals  
606 infected with *C. albicans* mutants with attenuated virulence phenotypes in mice or epithelial  
607 cell models. The *hog1* $\Delta/\Delta$  and *cka2* $\Delta/\Delta$  mutants exhibit attenuated virulence, while virulence  
608 of the *ahr1* $\Delta/\Delta$  mutant is comparable to the wild type. The *hog1* $\Delta/\Delta$  mutant differs  
609 significantly from the wild type ( $p=0.0001$ ). The complemented strain *hog1/hog1::HOG1*  
610 kills *M. sexta* at a level comparable to that of the wild type strain ( $p=0.21$ ). The *cka2* $\Delta/\Delta$   
611 mutant is significantly less virulent than the wild type ( $p=0.00021$ ), while the complemented  
612 strain *cka2/cka2::CKA2* is not ( $p=0.054$ ). Virulence of the *ahr1* $\Delta/\Delta$  mutant and the  
613 complemented strain *ahr1/ahr1::AHR1* does not differ significantly from the wild type  
614 (*ahr1* $\Delta/\Delta$   $p=0.72$ ; *ahr1/ahr1::AHR1*  $p=0.38$ ).

615 **Figure 2: Elevated temperatures increase susceptibility of *M. sexta* to *C. albicans*.** **a)** *M.*  
616 *sexta* caterpillars succumb to infection with the laboratory strain SC5314 in a dose-dependent  
617 manner at  $37^\circ\text{C}$  but less inoculum is required than for infections at  $25^\circ\text{C}$ . **b)** The weight of  
618 caterpillars infected with  $10^4$  cells per animal was comparable to that of caterpillars injected  
619 with 1x PBS, while animals infected with  $10^5$  cells showed a significant reduction in weight.  
620 **c)** Attenuated virulence of the *hog1* $\Delta/\Delta$  mutant is retained at  $37^\circ\text{C}$ . **d)** Animals infected with  
621 the mutant strain gain significantly more weight than those infected with the wild type strain.  
622 Infection with the complemented strain results in a comparable lack of weight gain.

623 **Figure 3: Fungal burden in faeces and hemolymph increases throughout the course of**  
624 **infection.** Colony forming units per gram faeces **(a)** and 100  $\mu\text{l}$  hemolymph **(b)** in the  
625 *hog1* $\Delta/\Delta$  mutant (YSD883), the wild type (SN95) and the control animals. Counts increase  
626 over time in the wild-type infected animals but not the ones injected with the *hog1* $\Delta/\Delta$  mutant  
627 or PBS. **c)** Weight increases in animals infected with *hog1* $\Delta/\Delta$  comparable to those injected  
628 with PBS, while animals injected with the wild type *C. albicans* strain experience reduced  
629 weight gain. The peak and drop in weight observed in the *hog1* $\Delta/\Delta$  and PBS groups, marked  
630 with a  $\odot$  is coinciding with the onset of pupation. This ‘pupation drop’ is due to the animals  
631 refraining from food upon entering the early stages of pupation.

632 **Figure 4: Antifungal efficacy testing of fluconazole and caspofungin.** Groups of ten *C.*  
633 *albicans* infected caterpillars were treated with increasing doses of antifungal drug. a)  
634 Survival improves upon treatment with fluconazole, while weight remains largely stagnant in  
635 surviving animals (b). c) Caspofungin treatment has a positive effect on *M. sexta* survival and  
636 weight (d). Weight data were not analysed for significance due to the lack of animals in the  
637 no treatment group.

638 **Figure 5: Caterpillars are susceptible to common yeast pathogens.** Groups of ten animals  
639 were infected with increasing doses of yeasts and survival was recorded daily. Caterpillars  
640 are not susceptible to *S. cerevisiae* or *M. pulcherrima* but infections with *C. neoformans*, *C.*  
641 *glabrata*, *C. auris* and *C. albicans* result in significantly reduced survival rates.

642 **Figure 6: Caterpillar weight as a measure of virulence.** Recording caterpillar weight daily  
643 revealed that yeast infections affect weight regardless of mortality rates. Daily weight  
644 measures were compared to that of PBS-injected animals and statistical significance assessed  
645 as follows: \*  $p < 0.05$ , \*\*  $p < 0.01$ , \*\*\*  $p < 0.001$ , \*\*\*\*  $p < 0.0001$ .

646

647 **Figure S1: Caterpillar growth is comparable between standard colony temperature and**  
648 **host body temperature.** Groups of ten animals were kept on standard diet at 25°C and 30°C  
649 (a) or 25°C and 37°C (b) for four days. Animals were scored daily for survival and weight as  
650 a measure of development. Within these parameters, caterpillar development is comparable  
651 across all three temperatures.

652 **Figure S2: Heat-killed *C. albicans* cells do not affect caterpillar survival or weight gain.**  
653 Groups of ten animals were injected with either live *C. albicans* wild-type YSD85 cells, heat-  
654 killed cells, or PBS. a) Only live yeast cells kill caterpillars. b) The weight gain in animals  
655 infected with heat-killed *Candida* cells is comparable to that of animals injected with PBS.

**Figure 1 - Lyons et al.**

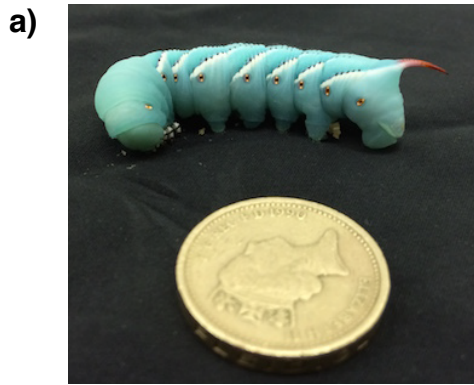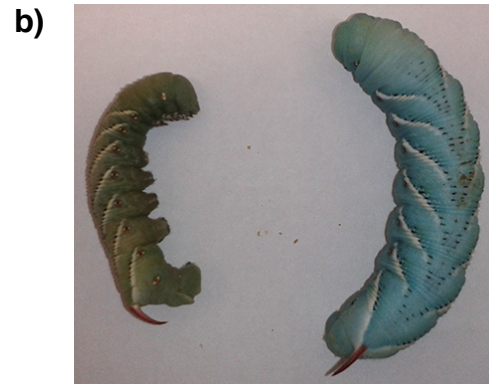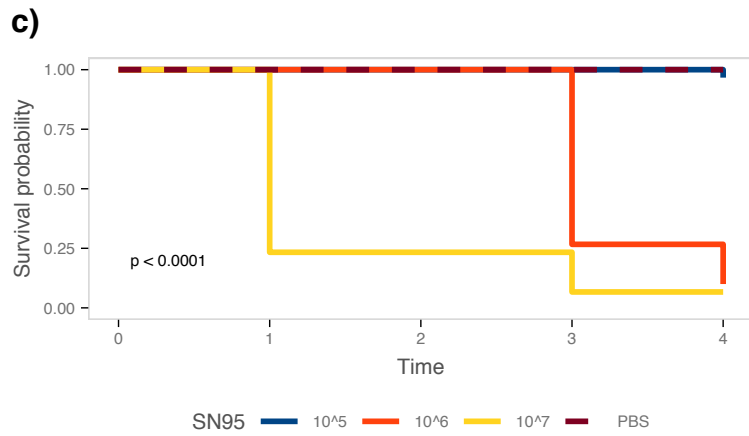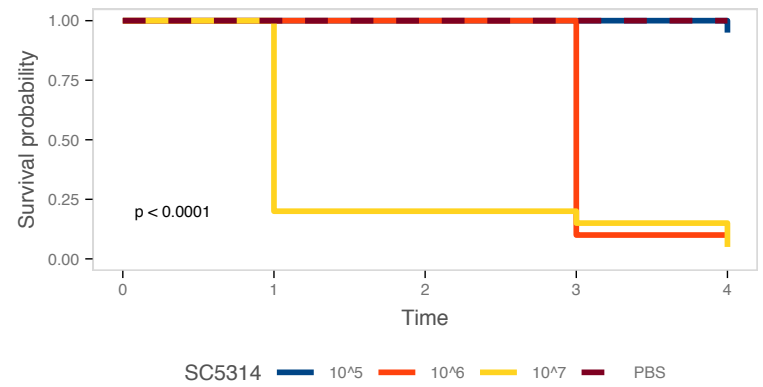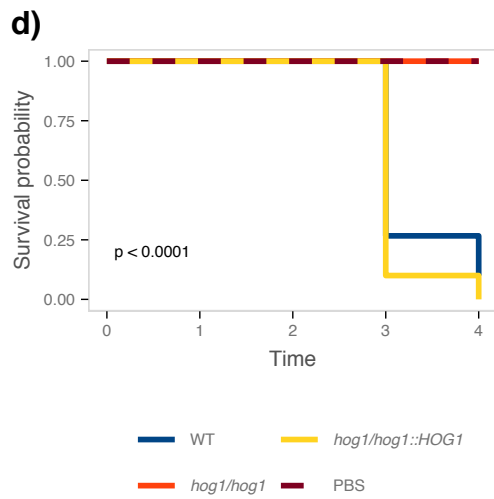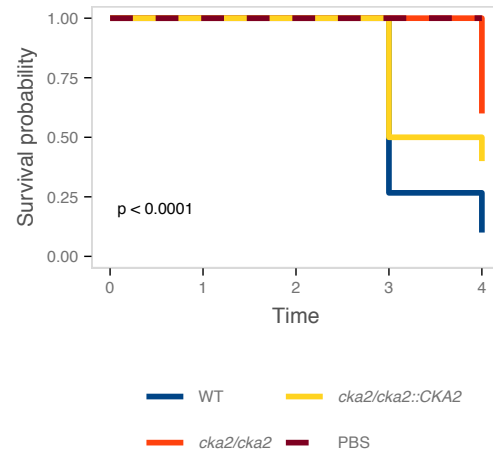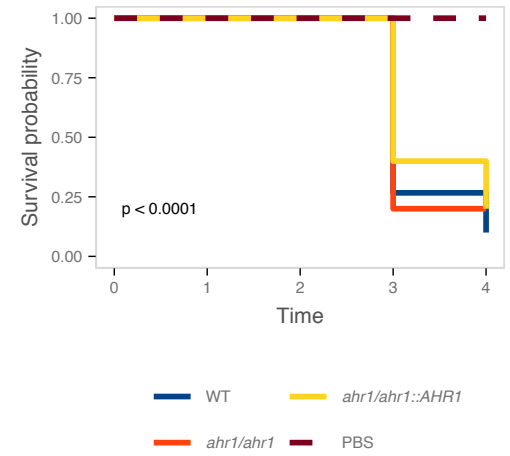



**Figure 2 - Lyons et al.**

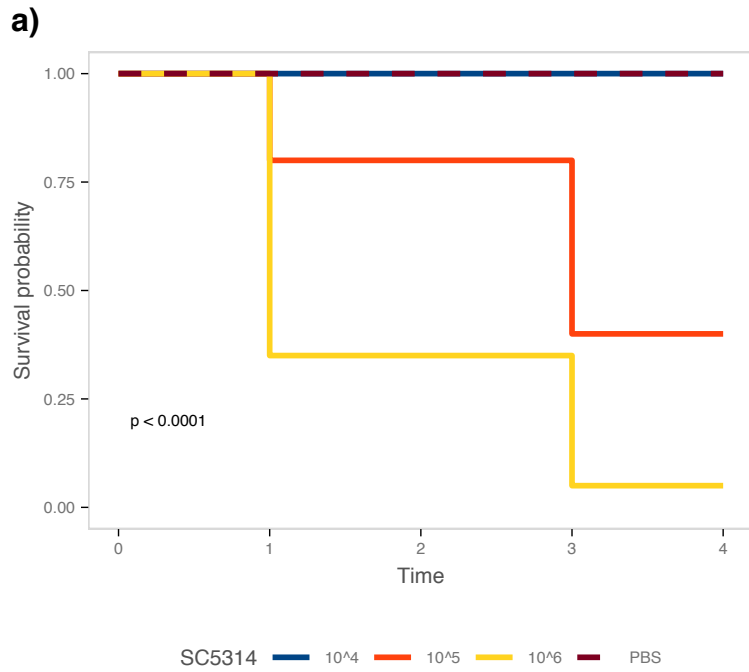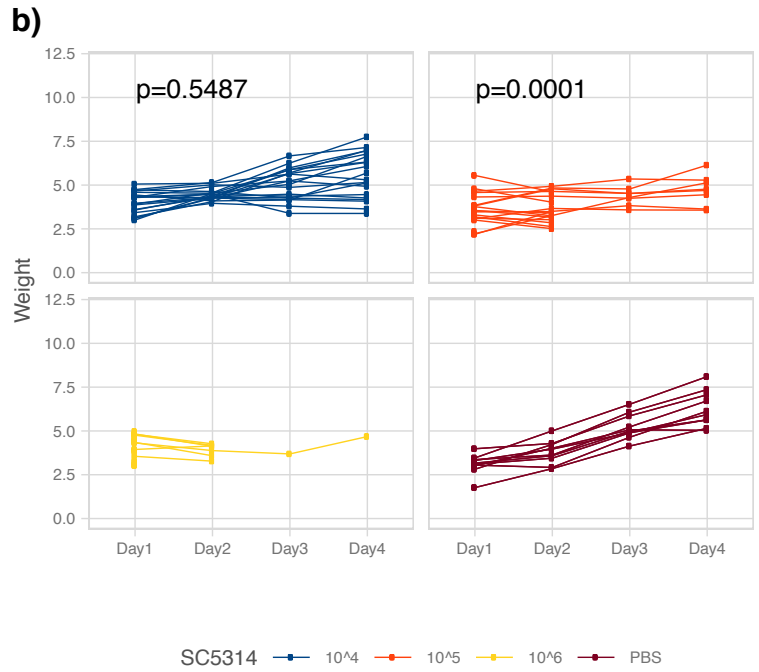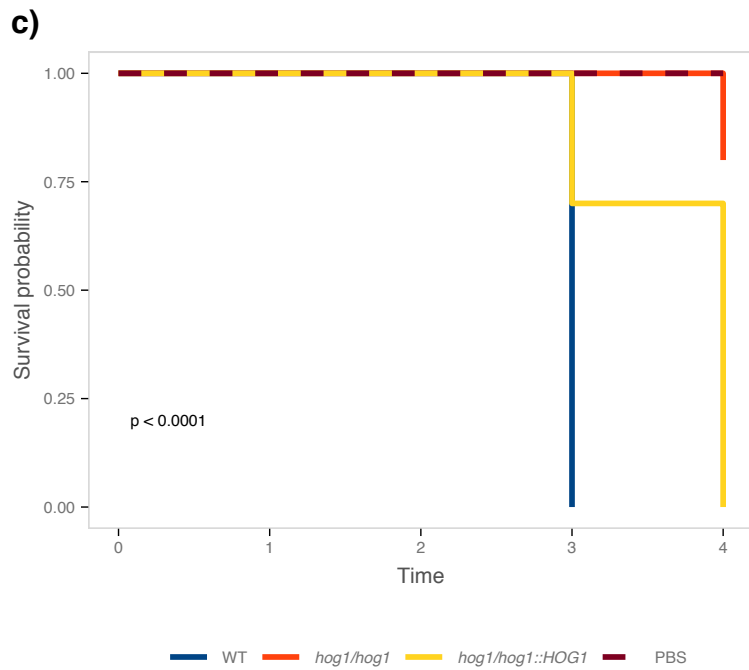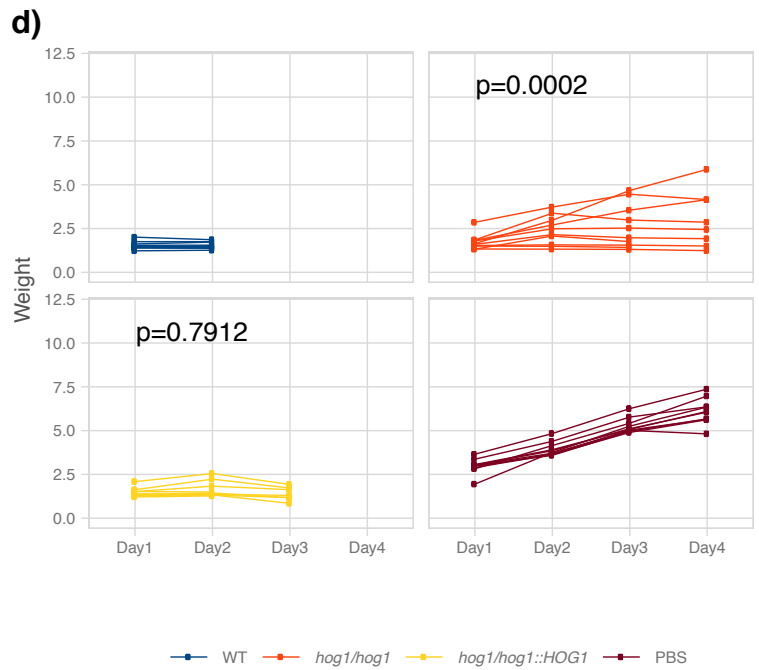

**Figure 3 - Lyons et al.**

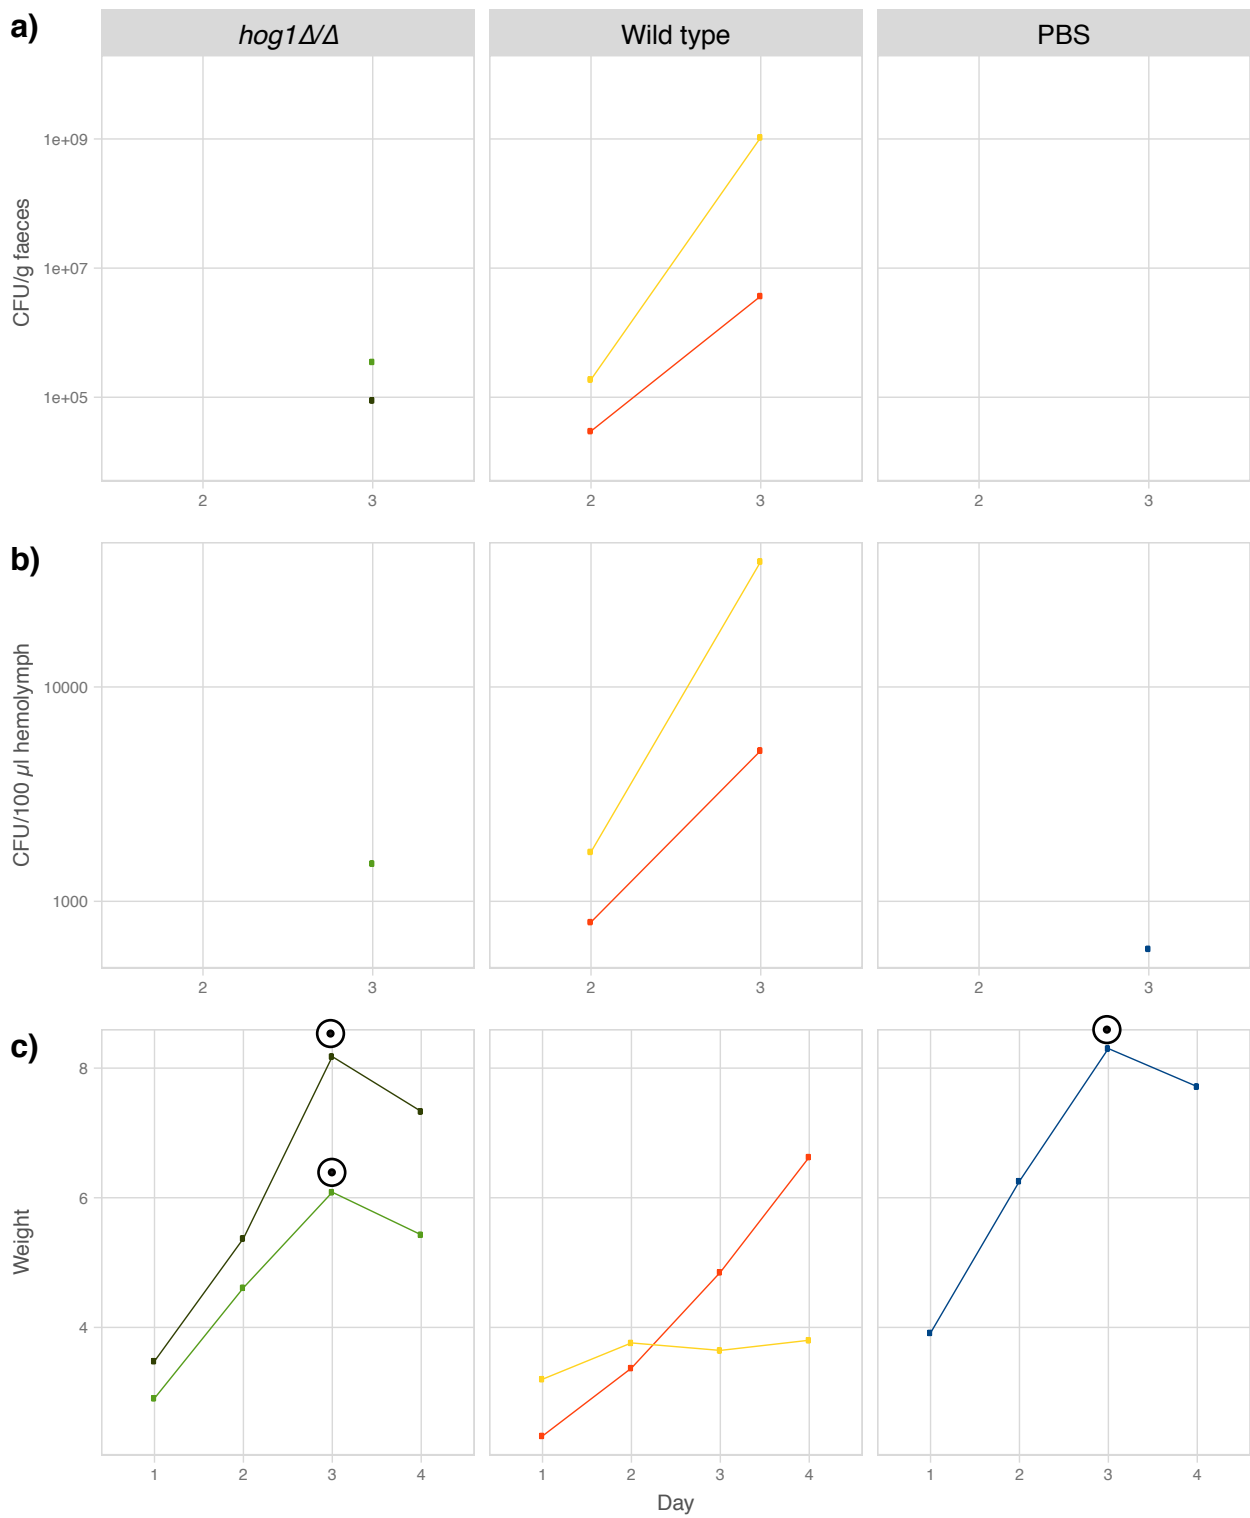

**Figure 4 - Lyons et al.**

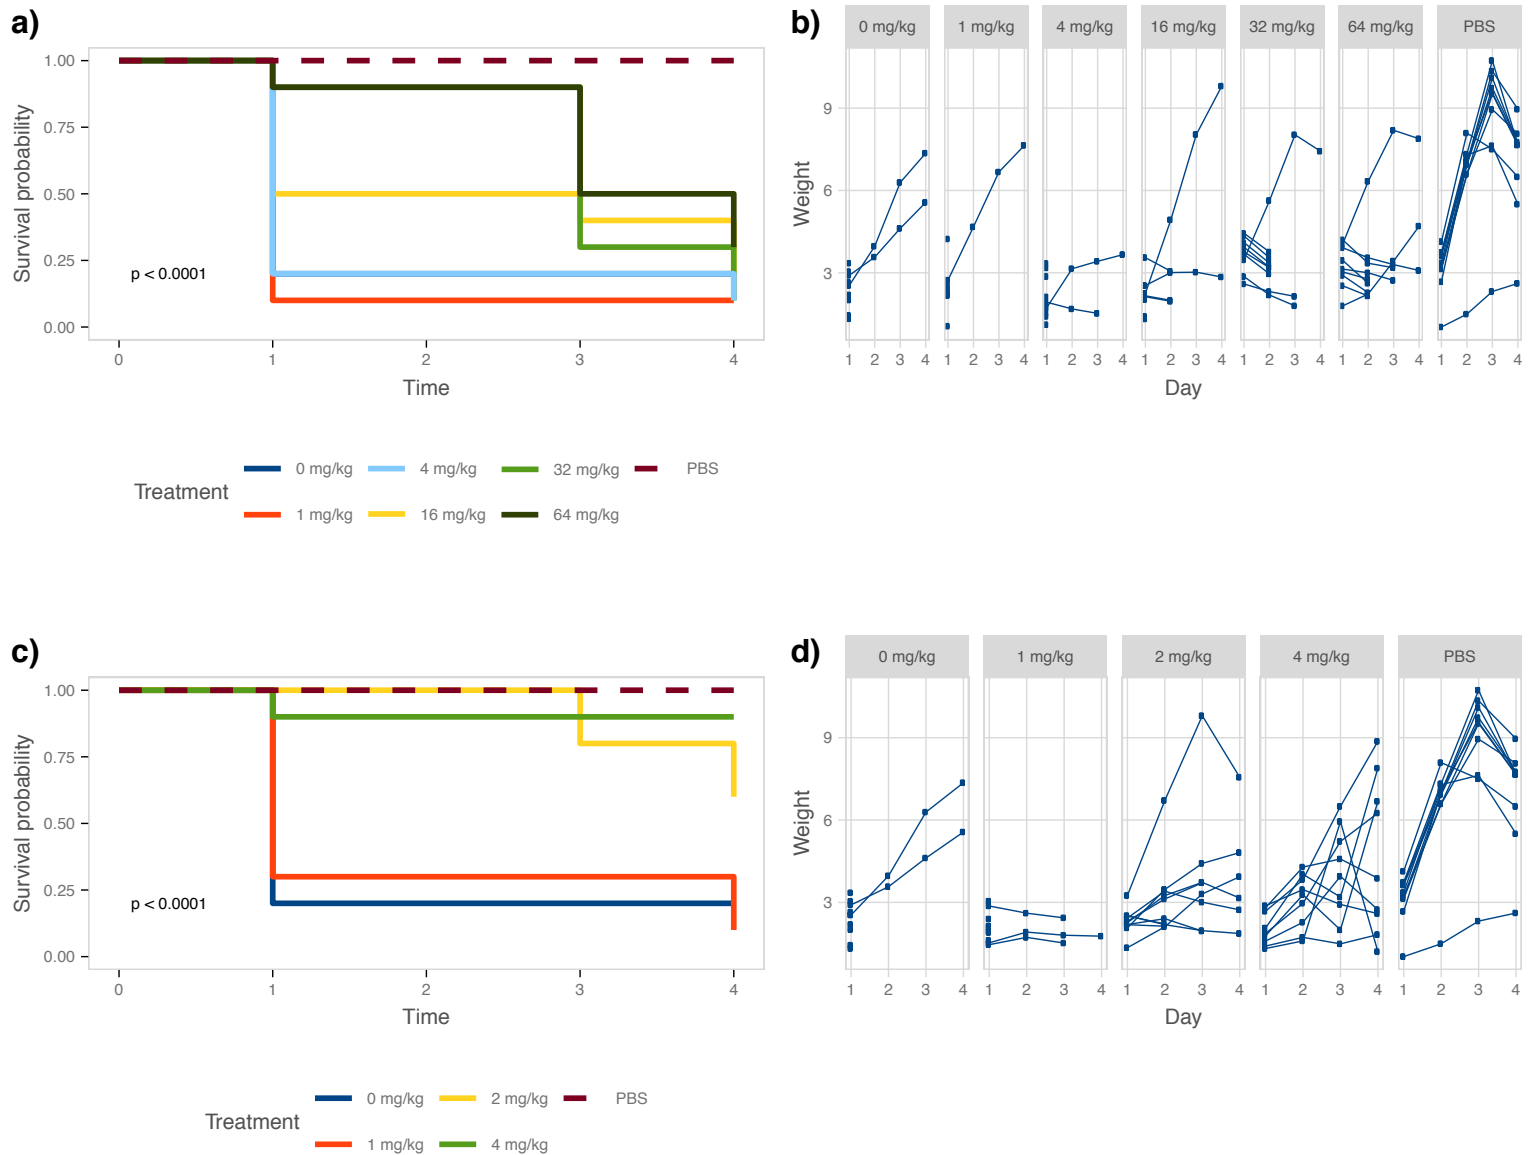

Figure 5 - Lyons et al.

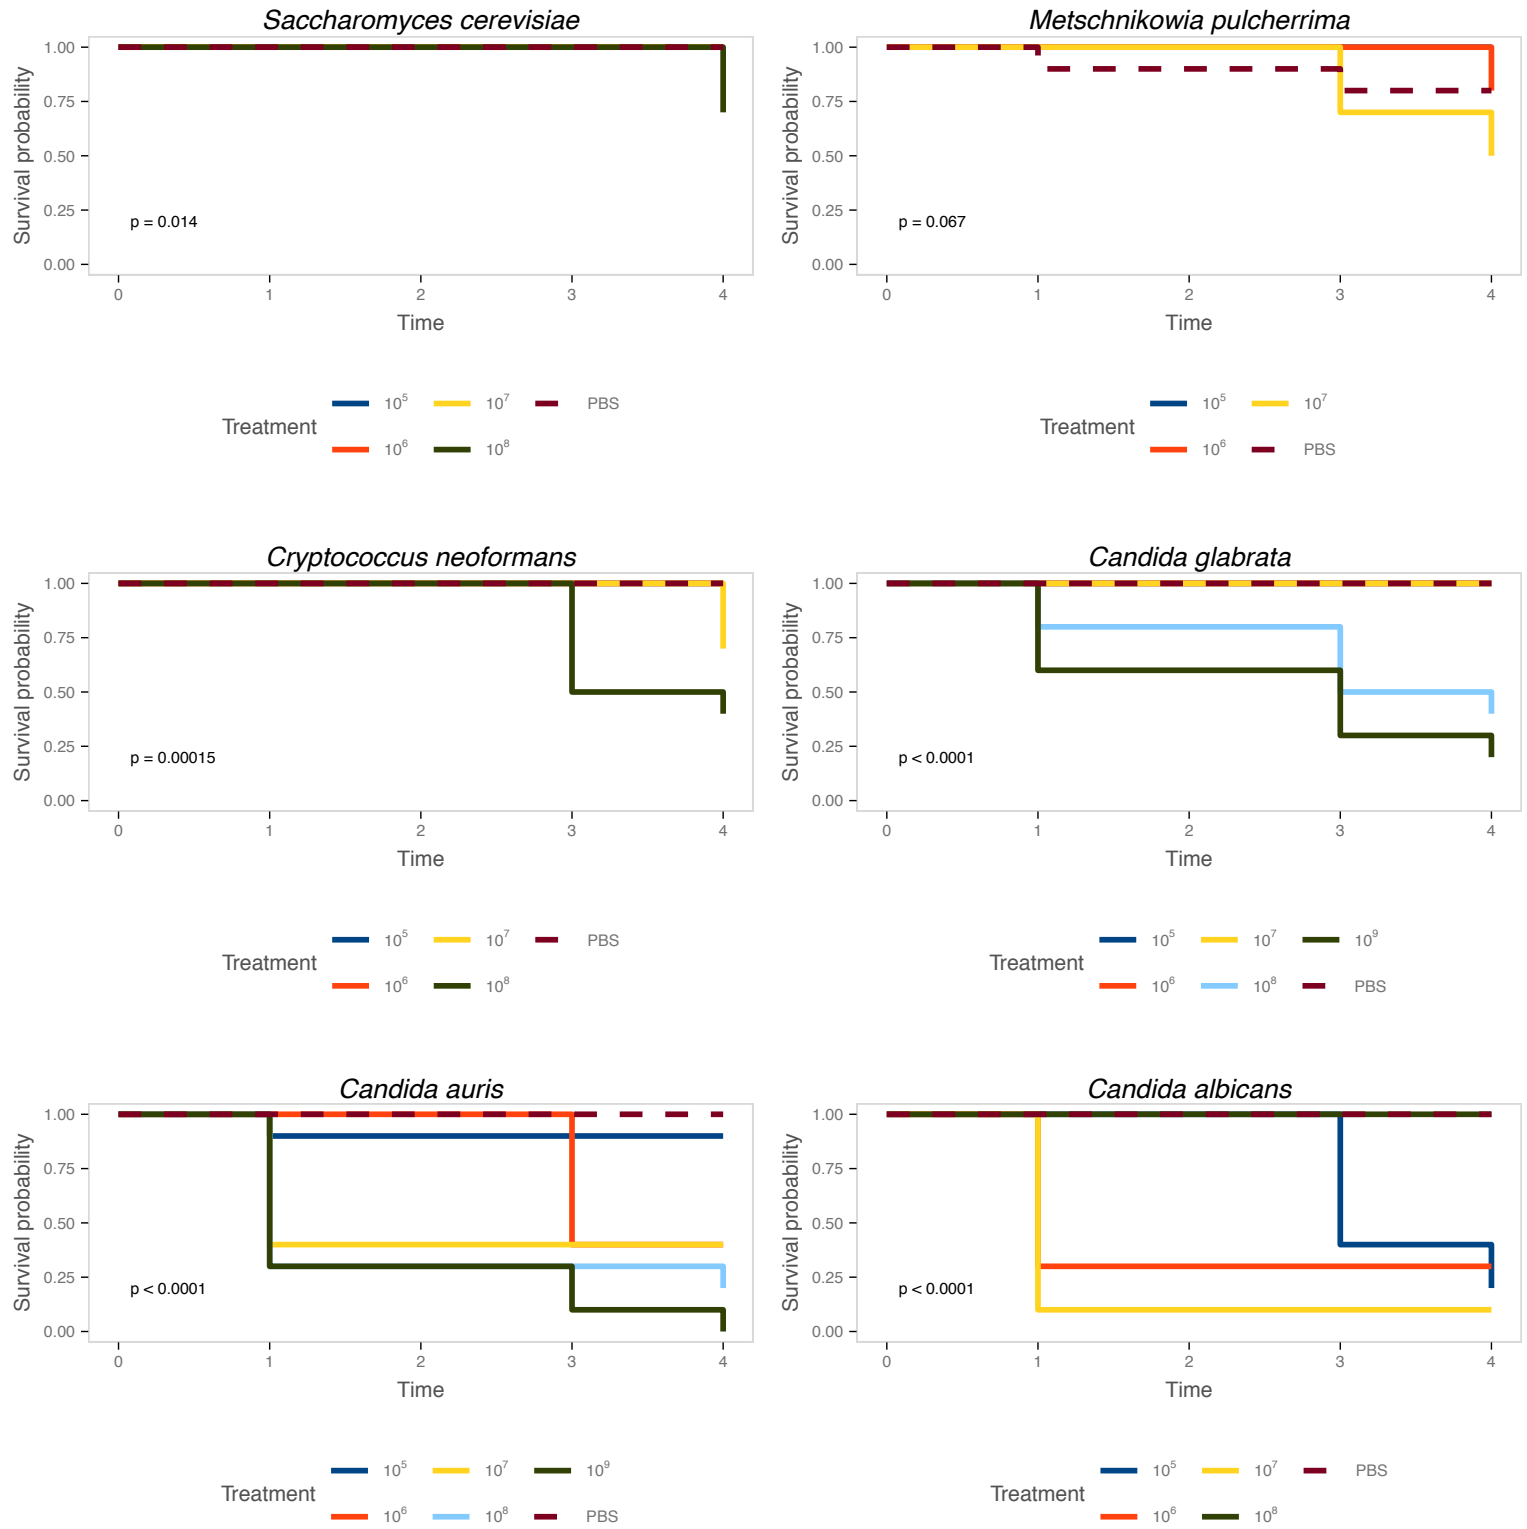

Figure 6 - Lyons et al.

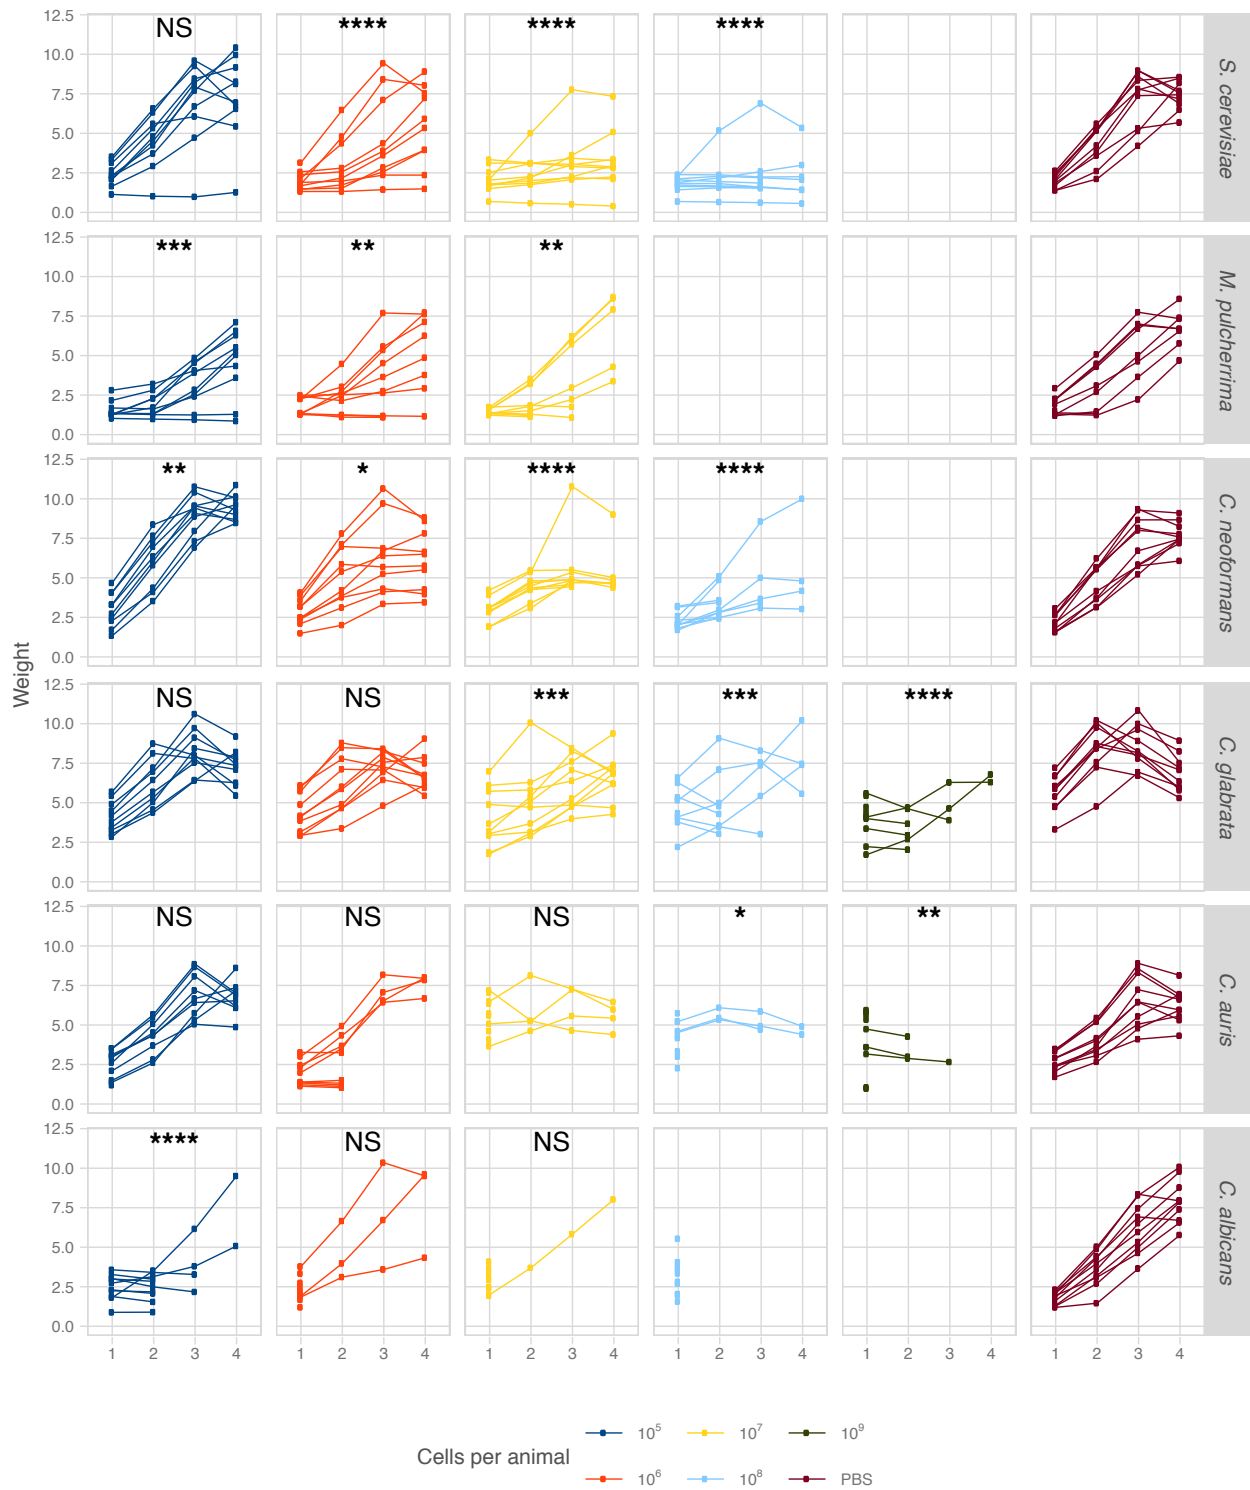

## Figure S1 - Lyons et al.

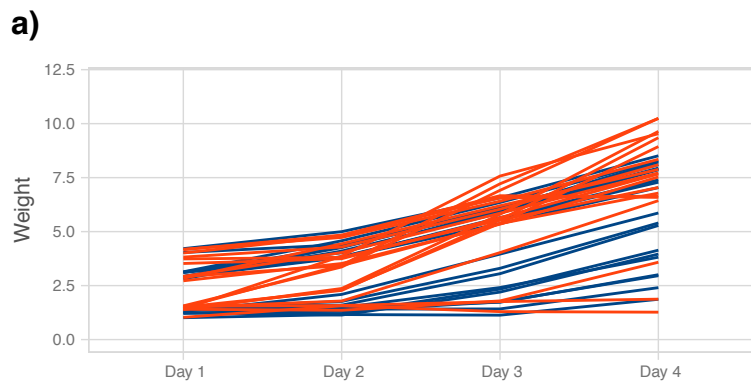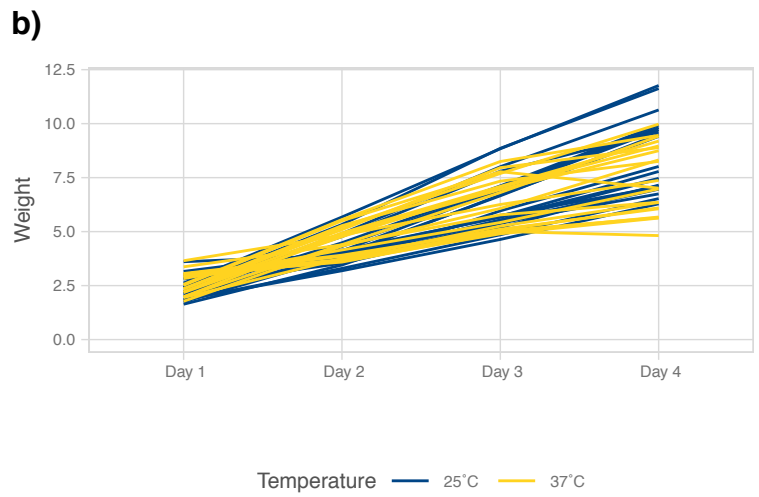

**Figure S2 - Lyons et al.**

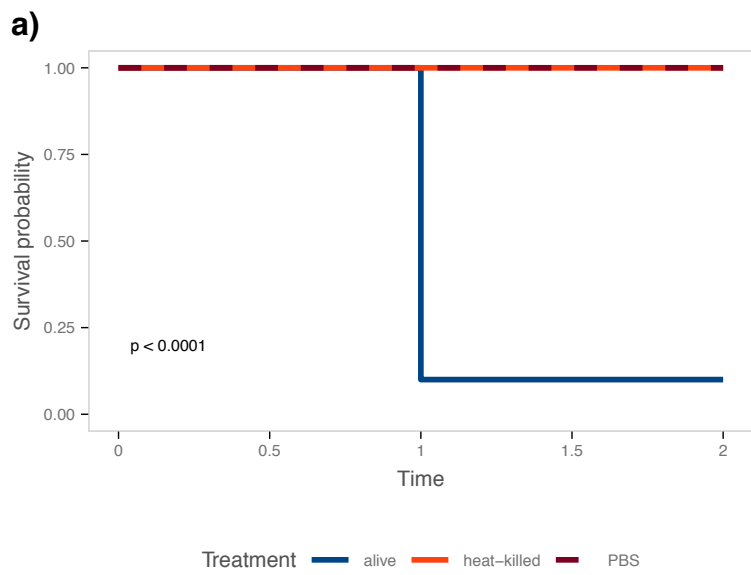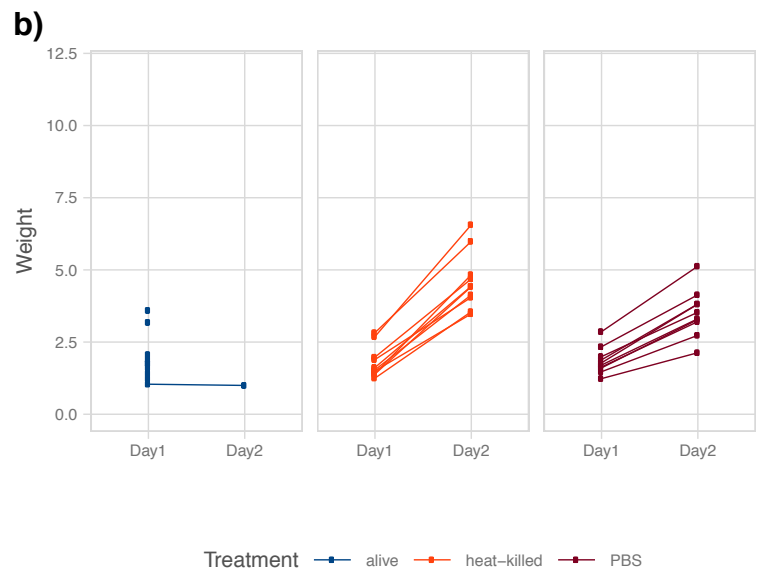

Source: https://www.biorxiv.org/content/10.1101/693226v1.full.pdf
